# Supplementary material for: Type IV Pili of Streptococcus sanguinis Contribute to Pathogenesis in Experimental Infective Endocarditis
Source: PubMed Central journal article supplement (PMC8579931; doi:10.1128/spectrum.01752-21), 2021-11-10
Supplement: spectrum01752-21_supp_1_seq13.pdf [file spectrum01752-21_supp_1_seq13.pdf]

**SK36 Parent**

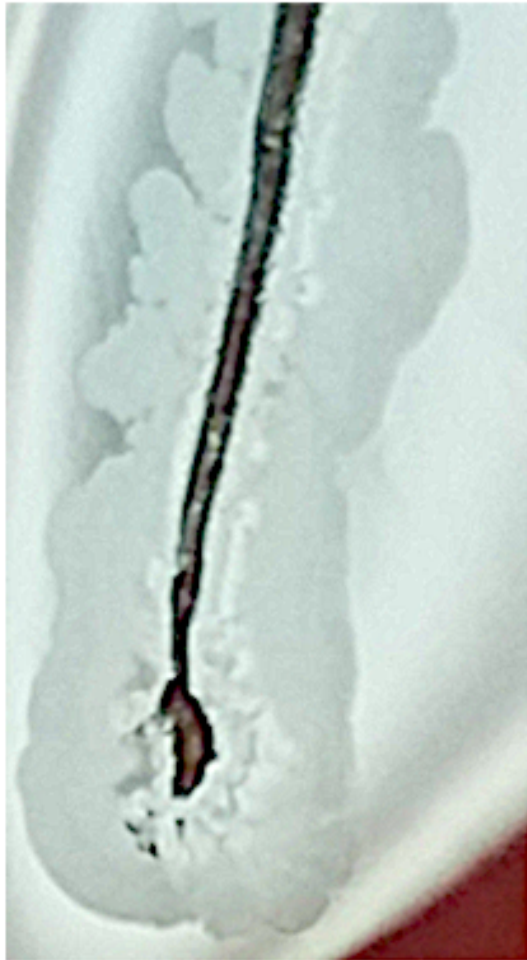

**SK36  $\Delta$ pilF**

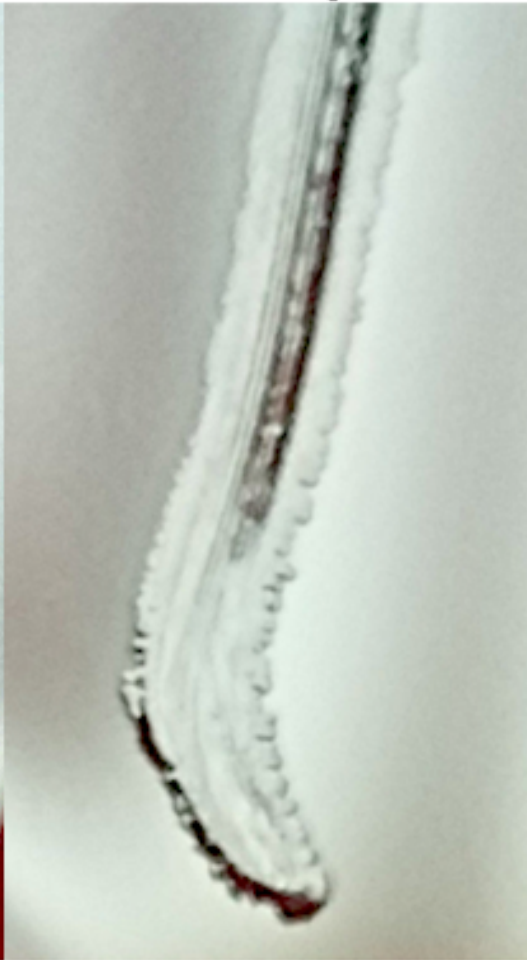

**$\Delta$ pilF Complement**

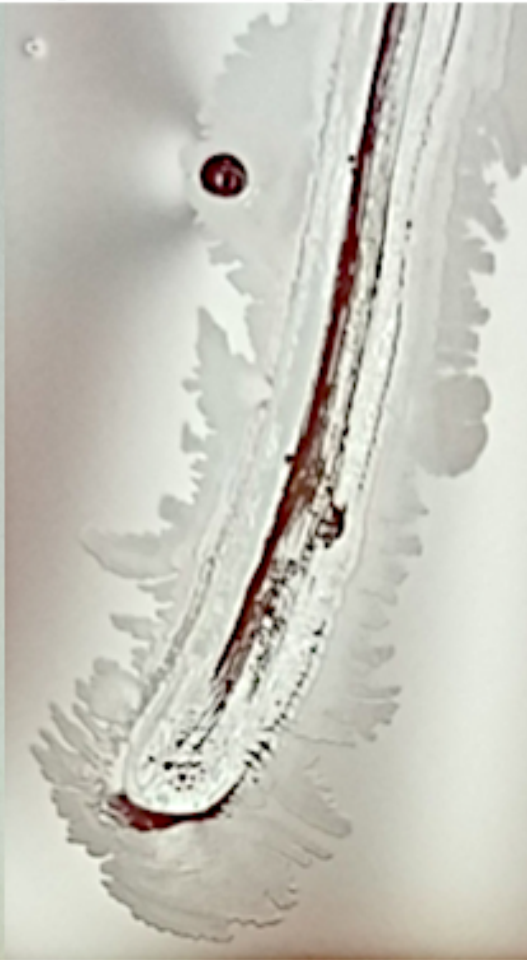

**SK36  $\Delta$ pilB**

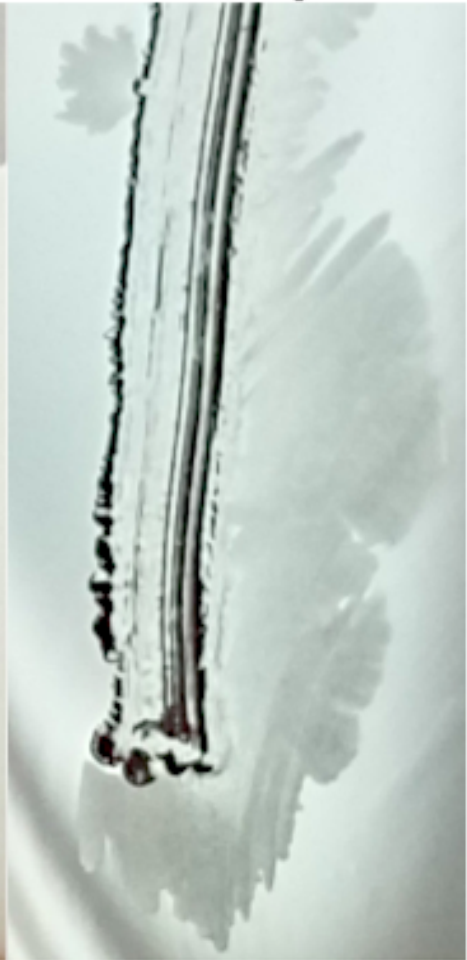

**SK36**

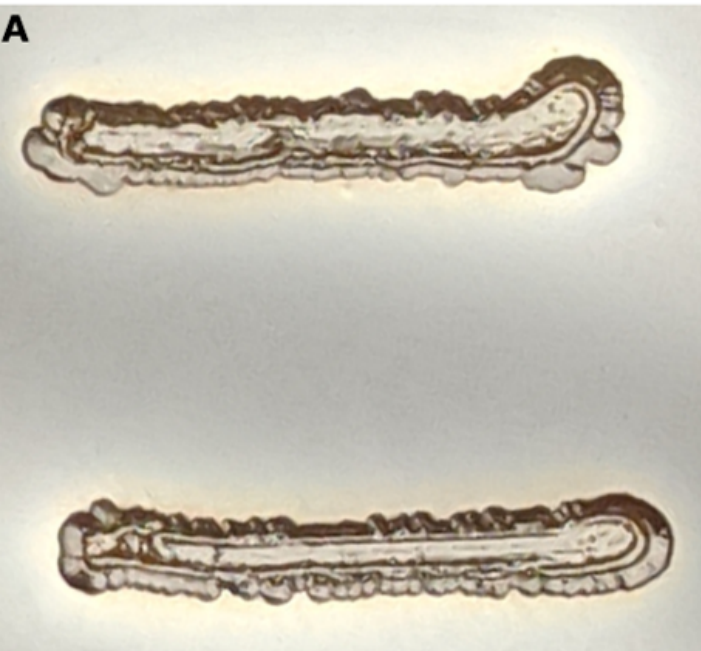

**SK36  $\Delta pilF$**

**SK36 t+ #1**

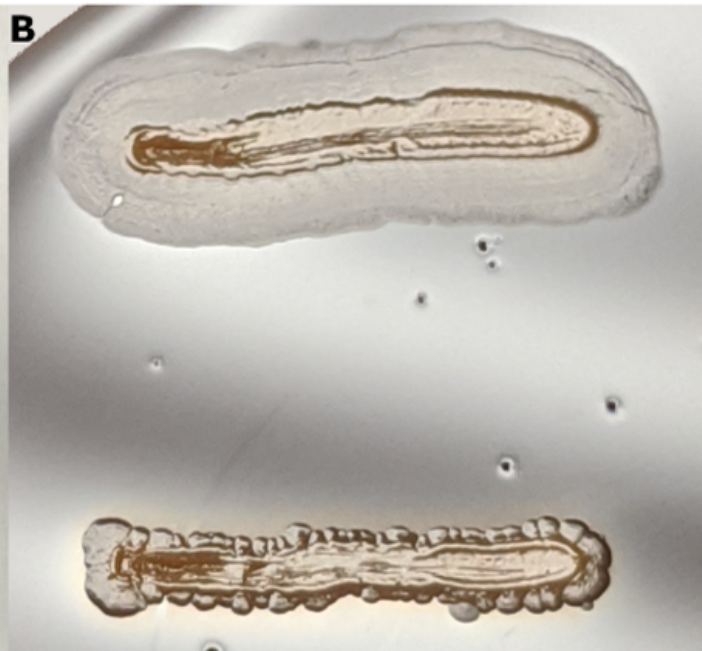

**SK36 t+ #1  $\Delta pilF$**

**SK36 t+ #2**

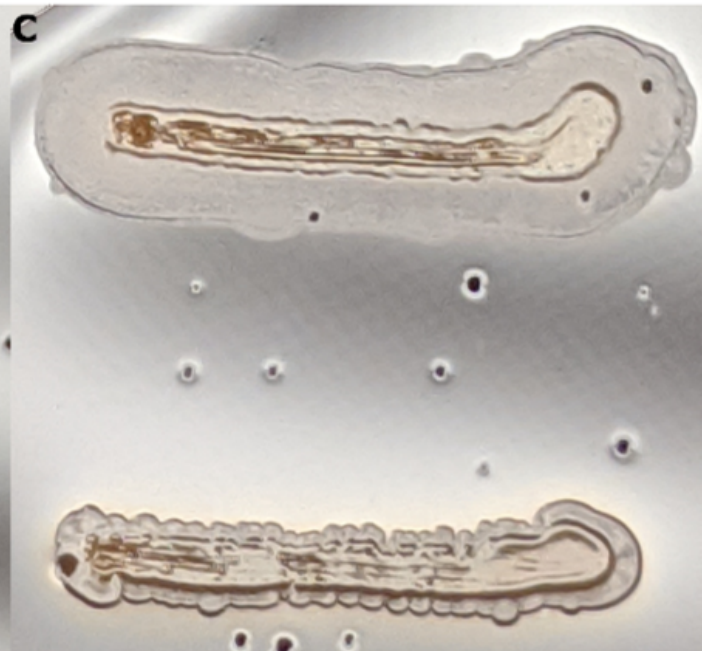

**SK36 t+ #2  $\Delta pilF$**

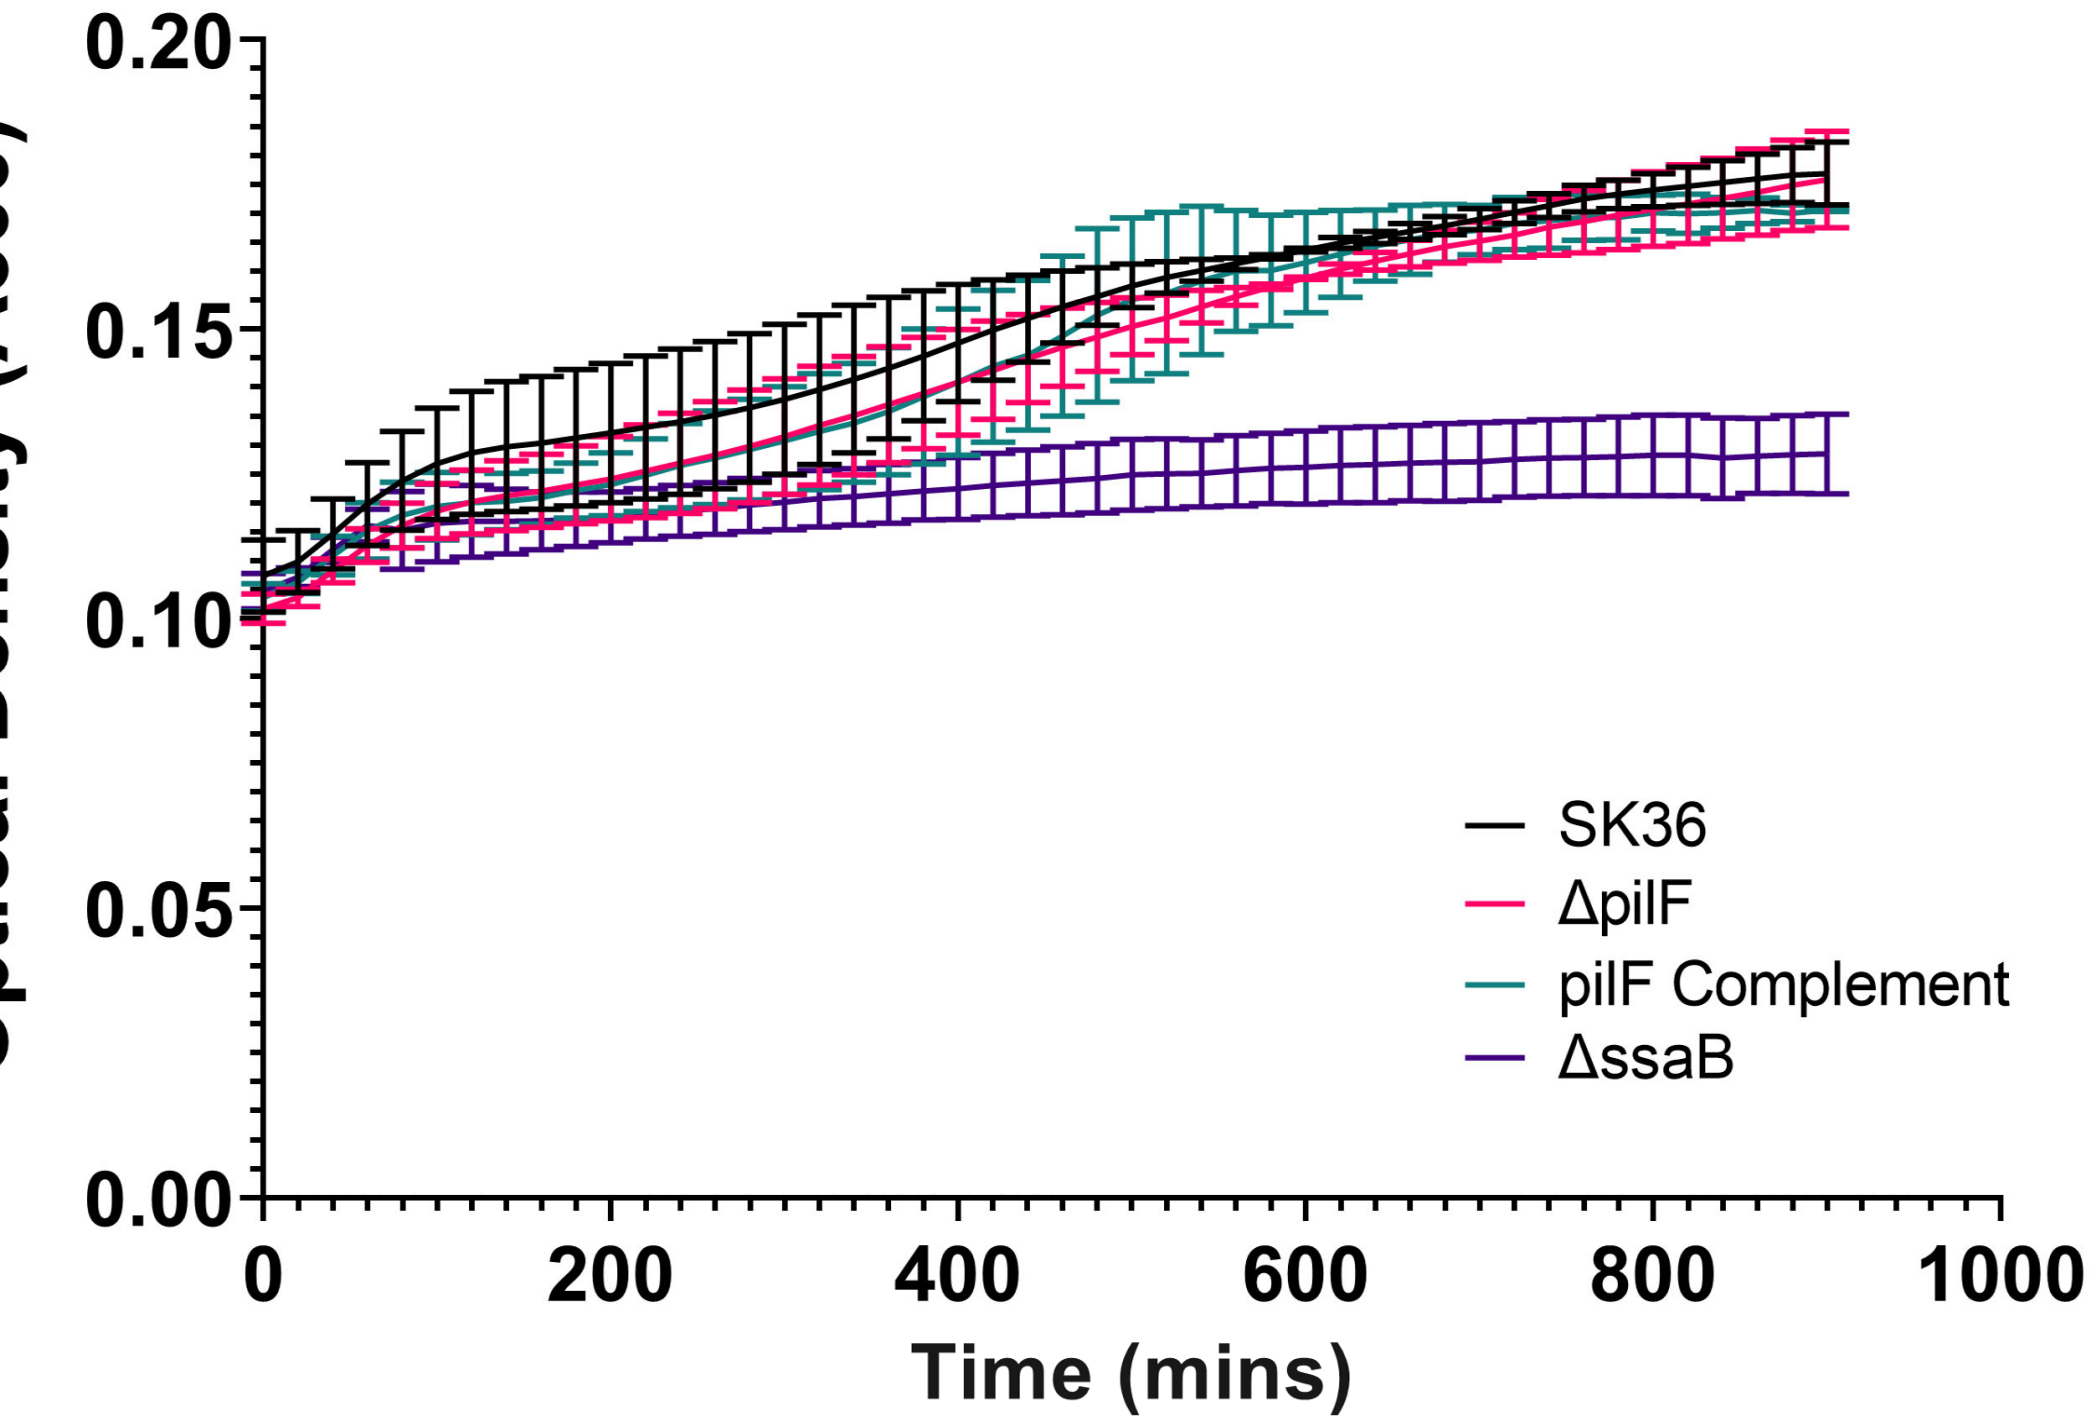



**SK36 Parent**

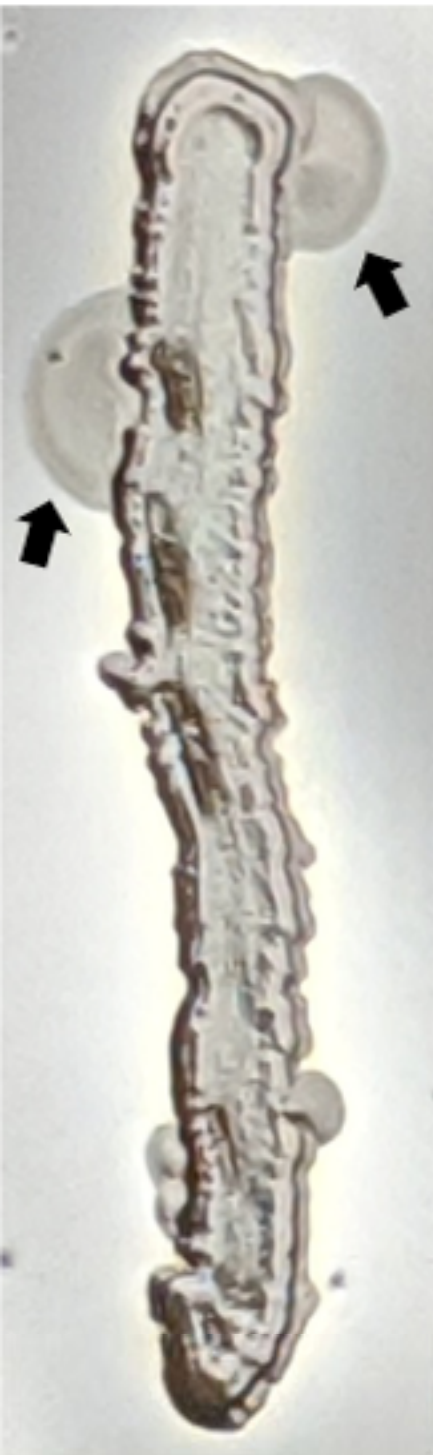

**Passaged Control**

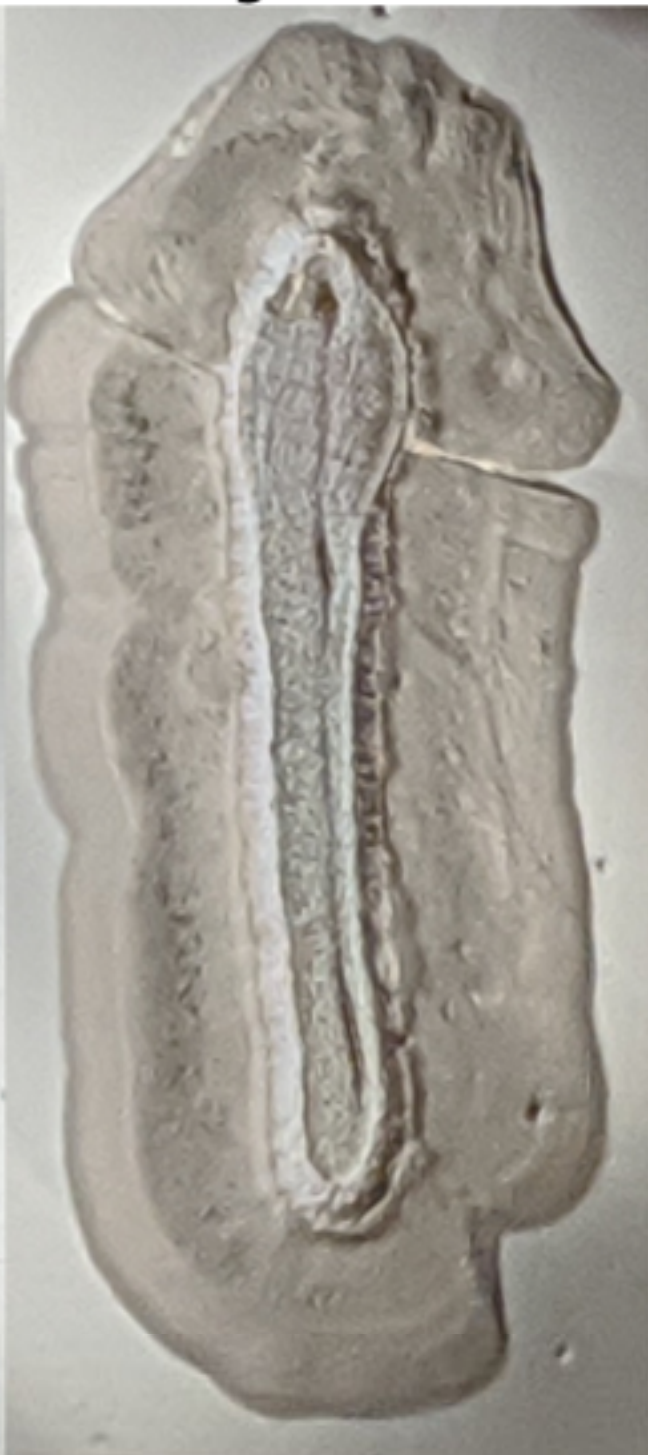

**R1**

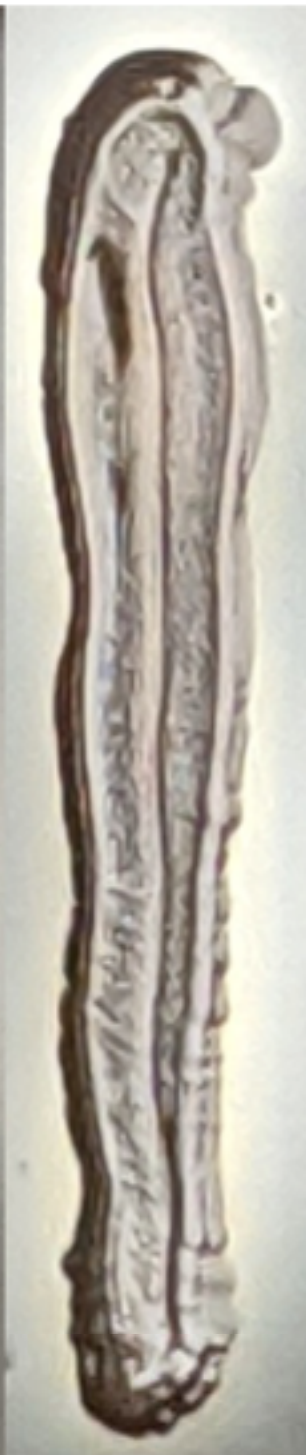

**R2**

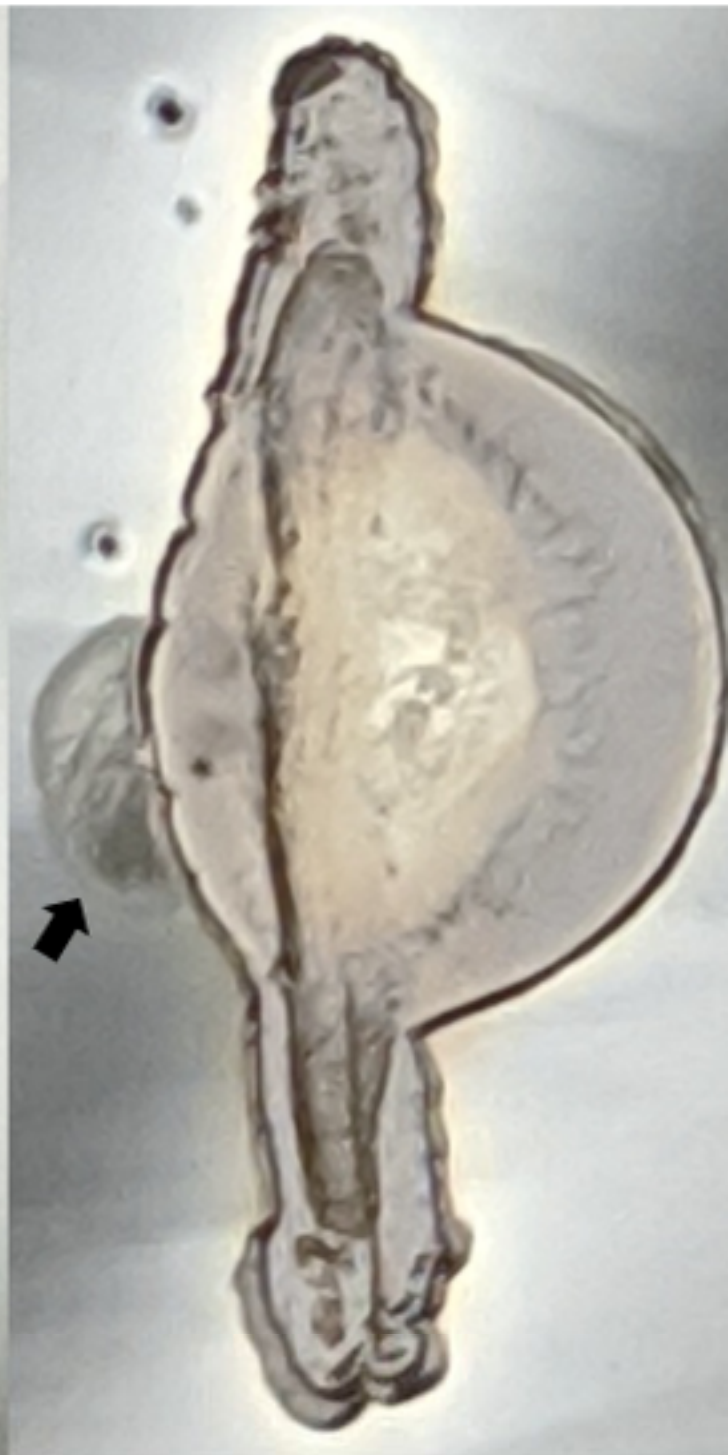

1 **Supplementary Material**

2 **Supplemental Figure 1:** The SK36  $\Delta pilF$  complement strain develops twitching motility during  
3 growth on blood agar as seen for the SK36 parent strain. The  $\Delta pilF$  mutant fails to exhibit any  
4 twitching motility even after multiple passages (not shown).

5 **Supplemental Figure 2:** Twitching phenotypes of passaged *S. sanguinis* SK36 and SK36  $\Delta pilF$ .  
6 Images were taken on day 4 of the first passage. A) SK36 does not exhibit twitching motility  
7 following first passage on blood agar. B & C) Individual twitching colonies isolated previously  
8 (“t+” designation) are capable of twitching motility following first passage (top) but lose this  
9 ability when the  $\Delta pilF$  mutation is introduced.

10 **Supplemental Figure 3:** SK36 WT,  $\Delta pilF$  mutant, and *pilF* complement exhibit similar growth  
11 in 100% rabbit serum. A  $\Delta ssaB$  strain is included as a control. Statistical analysis was performed  
12 using two-way ANOVA and corrected for multiple comparisons by the method of Dunnett. \* =  $p$   
13  $< 0.05$ . Error bars represent the 95% confidence intervals. Growth kinetics of the  $\Delta ssaB$  mutant  
14 reach statistical significance compared to WT starting at 400 minutes.

15 **Supplemental Figure 4:** *S. sanguinis* SK36 isolated from two different WT-infected rabbits (R1  
16 and R2) were assayed for their twitching motility phenotype following infection. As shown,  
17 SK36 following infection exhibits a motility phenotype similar to the SK36 parent rather than the  
18 passaged, hyper-twitching control strains. Arrows identify nascent zones of twitching in both the  
19 parent and R2 populations.

20
